# Supplementary material for: Assessing the photovoltaic technology landscape: efficiency and energy return on investment (EROI)
Source: Royal Society of Chemistry journal article supplement (doi:10.1039/c7ee01806a), 2018-01-01
Supplement: c7ee01806a1.xlsx [file c7ee01806a1.xlsx]

## Sheet: Single Crystal Silicon
AUTHOR	Schaeffer	Schaeffer	Kato	Kato	Frankl	Frankl	Kato	Alsema	Knapp	Mathur	GEMIS	Mathur	Gurzenich	Krauter	de Wild-Scholten	Fthenakis	Muneer	de Wild-Scholten	Amor	Laleman	de Wild-Scholten (UCTE)	de Wild-Scholten (CHINA)	Fthenakis
YEAR	1990	1990	1997	1997	1997	1997	1998	2000	2000	2002	2002	2004	2004	2004	2005	2006	2006	2009	2009	2010	2011	2011	2011
LIFETIME [yrs]	25	25	25	25	20	20	20	25	25	25	25	25	25	25	25	25	25	25	25	25	30	30	30
CAPACITY [kW]	2500	25000								0.035			1.56						3	3
EFFICIENCY [%]	14	15.5			12.7	12.7	12.2	14		13			12.7		14	14	14.4	13.2		14	14.8	14.8	20.1
WAFER THICKNESS [μm]																300		180			180	180
PRIMARY or ELECTRICITY	PRIMARY (35%)	PRIMARY (35%)	ELECTRICITY	ELECTRICITY	PRIMARY	PRIMARY	PRIMARY	PRIMARY (35%)	ELECTRICITY	PRIMARY (35%)	PRIMARY (undefined)	ELECTRICITY	PRIMARY (31.7%)	MIX	PRIMARY	PRIMARY (31%)	PRIMARY (undefined)	PRIMARY (29%)	PRIMARY (undefined)	PRIMARY (35%)	PRIMARY (30%)	PRIMARY (30%)	PRIMARY (30%)
CONVERSION FACTOR [%]	35	35	30	30	35	35	38	35	30	35	30	30	31.7	30	30	31	30	29	30	35	30	30	30
CAPACITY FACTOR [%]	15	15	15	15	15	15	15	15	15	15	15	15	15	15	15	15	15	15	15	15	15	15	15
RATED INSOLATION [W/m^2]					1000	1000	1000	1000							1000	1000		1000			1000	1000	1000
CONSTRUCTION TIME [yrs]												1
CE(e)D MATERIALS [kWh(e)/Wp]								3.18179											#REF!
ERROR
CE(e)D MANUFACTURE [kWh(e)/Wp]								0.559417
ERROR
CE(e)D CELL [kWh(e)/Wp]								3.74121
ERROR
CE(e)D MODULE [kWh(e)/Wp]	6.125	3.85	12.4	17.7	5.74125	13.3012	12.6237	4.69696	5.59722	14.1925	4.134		5.07849		2.5	3.0754	3.75	1.76978			1.75694	2.13889	1.35
ERROR
CE(e)D SYSTEM [kWh(e)/Wp]	7.175	4.27			7.60825	15.1602		6.04419				15.25	5.73987	5.5574		3.40877	4.93125	2.29339		3.35417	1.82861	2.21222	1.6875
ERROR	0											5.25								0.194444
TOTAL SYSTEM ENERGY INTENSITY [kWh(e)-in/kWh(e)-out]	0.218417	0.129985			0.231606	0.461499		0.183994				0.464231	0.17473	0.169175		0.103768	0.150114	0.0698141		0.102106	0.0556655	0.0673431
ERROR												0.159817								0.00591916
EROI [kWh(e)-out/kWh(e)-in]	4.5784	7.69321			4.31768	2.16685		5.43497				2.1541	5.72313	5.91104		9.63691	6.6616	14.3238		9.79379	17.9645	14.8493	20.61
EPBT [kWh(e)-in/kWh(e)-out*yrs]	5.46043	3.24962			4.63212	9.22998		4.59984				11.6058	4.36824	4.22938		2.59419	3.75285	1.74535		2.55264	1.66996	2.02029	1.4556
CE(e)D MODULE [kWh(e)/m2]	857.5	596.75			729.139	1689.26	1540.1	657.575		1845.03			644.968		350	430.556	540	233.611			260.028	316.556	271.35
CE(e)D SYSTEM [kWh(e)/m2]	1004.5	661.85			966.248	1925.35		846.186					728.963			477.228	710.1	302.728			270.634	327.409	339.188
CE(e)D BOS REAL [kWh(e)/m2]	147	65.1			237.109	236.093		188.611					83.9948			46.6722	170.1	69.1167			10.6067	10.8533	67.8375
CE(e)D BOS MIN [kWh(e)/m2]	10.6	10.6			10.6	10.6	10.6	10.6		10.6			10.6		10.6	10.6	10.6	10.6			10.6	10.6	10.6
CE(e)D SYSTEM MIN [kWh(e)/m2]	868.1	607.35			739.739	1699.86	1550.7	668.175		1855.62			655.568		360.6	441.156	550.6	244.211			270.628	327.156	281.95
CE(e)D SYSTEM MIN [kWh(e)/Wp]	6.20071	3.91839			5.82471	13.3847	12.7106	4.77268		14.274			5.16196		2.57571	3.15111	3.82361	1.85008			1.82857	2.21051	1.40274
E(e)ROI MIN [kWh(e)-out/kWh(e)-in]	5.29778	8.38355			5.63976	2.45429	2.58445	6.88293		2.30138			6.36387		12.7537	10.4249	8.59135	17.7559			17.9649	14.8608	28.1022
CE(e)D SYSTEM MAX [kWh/m2]	1152.5	891.75			1024.14	1984.26	1835.1	952.575		2140.03			939.968		645	725.556	835	528.611			555.028	611.556	566.35
CE(e)D SYSTEM MAX [kWh/Wp	8.23214	5.75323			8.06408	15.6241	15.0418	6.80411		16.4617			7.40133		4.60714	5.18254	5.79861	4.00463			3.75019	4.13213	2.81766
E(e)ROI MAX [kWh(e)-out/kWh(e)-in]	3.99046	5.70984			4.07362	2.10252	2.18392	4.82797		1.99554			4.43839		7.13023	6.33859	5.66515	8.20301			8.75956	7.94989	11.6586
HARMONIZED CE(e)D MODULE [kWh(e)/m2]	735	511.5			624.976	1447.94	1215.87	563.636		1581.45			610.38		350	416.667	540	241.667			260.028	316.556	271.35
HARMONIZED CE(e)D SYSTEM [kWh(e)/m2]	861	567.3			828.212	1650.3		725.302					689.871			461.833	710.1	313.167			270.634	327.409	339.188
HARMONIZED CE(e)D SYSTEM MIN [kWh(e)/m2]	744.086	520.586			634.062	1457.02	1224.23	572.721		1590.54			620.412		360.6	426.925	550.6	252.632			270.628	327.156	281.95
HARMONIZED CE(e)D SYSTEM MAX [kWh(e)/m2]	987.857	764.357			877.833	1700.79	1448.76	816.493		1834.31			889.56		645	702.151	835	546.839			555.028	611.556	566.35
HARMONIZED CE(e)D MODULE [kWh(e)/W(p)]	5.25	3.3			4.92107	11.4011	9.96612	4.02597		12.165			4.80614		2.5	2.97619	3.75	1.83081			1.75694	2.13889	1.35
HARMONIZED CE(e)D SYSTEM [kWh(e)/W(p)]	6.15	3.66			6.52136	12.9945		5.18073					5.43205			3.29881	4.93125	2.37247			1.82861	2.21222	1.6875
HARMONIZED CE(e)D SYSTEM MIN [kWh(e)/W(p)]	5.3149	3.35862			4.99261	11.4726	10.0347	4.09087		12.2349			4.88513		2.57571	3.04946	3.82361	1.91388			1.82857	2.21051	1.40274
HARMONIZED CE(e)D SYSTEM MAX [kWh(e)/W(p)]	7.05612	4.93134			6.91207	13.3921	11.8751	5.83209		14.1101			7.00441		4.60714	5.01536	5.79861	4.14272			3.75019	4.13213	2.81766
HARMONIZED E(e)ROI [kWh(e)-out/kWh(e)-in]	5.34146	8.97541			5.0373	2.52799		6.3408					6.04744			9.95814	6.6616	13.8463			17.9645	14.8493	19.4667
HARMONIZED E(e)ROI MIN [kWh(e)-out/kWh(e)-in]	6.18074	9.78081			6.57972	2.86334	3.27364	8.03008		2.68494			6.72449		12.7537	10.7724	8.59135	17.1641			17.9649	14.8608	23.4185
HARMONIZED E(e)ROI MAX [kWh(e)-out/kWh(e)-in]	4.65553	6.66148			4.75255	2.45294	2.76629	5.63263		2.32813			4.6899		7.13023	6.54988	5.66515	7.92957			8.75956	7.94989	11.6586
INSTALLED CAPACITY [GW(p)]			0.32	0.32	0.32	0.32	0.37	0.57	0.57	0.81	0.81	1.34	1.34	1.34	1.76	2.55	2.55	8.68	8.68	14.25	26.11		26.11
MEAN CE(e)D [kWh(e)/m2]	730.828
MEAN HARMONIZED CE(e)D [kWh(e)/m2]	645.801

## Sheet: Multi Crystal Silicon
AUTHOR	Schaeffer	Schaeffer	Prakash	Alsema	Frankl	Frankl	Frankl	Frankl	Frankl	Alsema	Zhai	Zhai	Gurzenich	Mathur	Krauter	Battisti	de Wild-Scholten	Fthenakis	Alsema	Mason	Kannan	Mohr	Pacca	Raugei	Roes	Zhai	Ito	Ito	Stoppato	de Wild-Scholten	Amor	Laleman	Zhai	de Wild-Scholten (UCTE)	de Wild-Scholten (CHINA)
YEAR	1990	1990	1995	1995	1997	1997	1997	1997	1997	2000	2001	2004	2004	2004	2004	2005	2005	2006	2006	2006	2006	2007	2007	2007	2007	2007	2008	2008	2008	2009	2009	2010	2011	2011	2011
LIFETIME [yrs]	25	25	25	15	25	25	25	20	20	25	25	25	25	25	25	25	25	25	25	25	25	25	25	25	25	25	25	25	25	25	25	25	25	30	30
CAPACITY [kW]	2500	25000											1.56			1				3500	2.7	1	10.4				152	120	52.52		3	3
EFFICIENCY [%]	12	13.5	10	13	12.1	12.1	12.1	12.1	12.1	13	13.2	13.2	12.1			10.7	13.2	13.2	13.2	12.2	11.86	14.8	12.92	14	13.2	13.2	15.8	12.8	16	13.2		13.2	13.2	14.1	14.1
WAFER THICKNESS [μm]											200	200						285				300				200				200			200	180-200	180-200
PRIMARY or ELECTRICITY	PRIMARY (35%)	PRIMARY (35%)	PRIMARY (35%)	PRIMARY	PRIMARY (39.1%)	PRIMARY (39.1%)	PRIMARY (39.1%)	PRIMARY	PRIMARY	PRIMARY (35%)	PRIMARY (31%)	PRIMARY (31%)	PRIMARY (31.7%)	ELECTRICITY	MIX	PRIMARY (undefined)	PRIMARY	PRIMARY (31%)	PRIMARY (UCTE)	PRIMARY (33%)	PRIMARY (33%)	PRIMARY (41%)	PRIMARY (33%)	PRIMARY (32%)	PRIMARY (36%)	PRIMARY (31%)	PRIMARY (30%)	PRIMARY (30%)	PRIMARY (undefined)	PRIMARY (29%)	PRIMARY (unspecified)	PRIMARY (35%)	PRIMARY (31%)	PRIMARY (30%)	PRIMARY (30%)
CONVERSION FACTOR [%]	35	35	35	30	39.1	39.1	39.1	35	35	35	31	31	31.7	30	30	30	30	31	31	33	33	41	33	32	36	31	30	30	30	29	30	35	31	30	30
CAPACITY FACTOR [%]	15	15	15	15	15	15	15	15	15	15	15	15	15	15	15	15	15	15	15	15	15	15	15	15	15	15	15	15	15	15	15	15	15	15	15
RATED INSOLATION [W/m^2]			1000	1000	1000	1000	1000	1000	1000	1000							1000	1000	1000	1000	1000	1000							1000	1000				1000	1000
CONSTRUCTION TIME [yrs]														1
CE(e)D MATERIALS [kWh(e)/Wp]					5.99156	5.99156	5.99156			2.22444	1.43519	1.10901				3.4769			1.50042							0.82197			0.668828				0.619739
ERROR					3.34414	3.34414	3.34414
CE(e)D MANUFACTURE [kWh(e)/Wp]					0.762971	0.762971	0.762971			0.63	1.01115	0.75021				0.0887375										0.632786			0.309694				0.567551
ERROR
CE(e)D CELL [kWh(e)/Wp]			9.717		6.75453	6.75453	6.75453			2.85444	2.44634	1.85922				3.56563			1.8266							1.45476			0.978522				1.18729
ERROR			1.45		3.34414	3.34414	3.34414			0	0	0				0			0							0			0				0
CE(e)D MODULE [kWh(e)/Wp]	5.775	2.625	11.677	7.33333	7.56239	7.56239	7.56239	2.41071	6.65714	3.76411	3.14626	2.34549	1.99271			4.03352	1.94667	2.41372	2.08754	1.39003	5.2812	3.18889	3.15333	3.59407	2.49	1.7825	1.0895	1.37392	1.19712	1.64773			1.51785	1.02778	1.24306
ERROR			0.190001		3.34361	3.34361	3.34361			0	0	0	0			0		0	0	0		0	0	1.94667	0	0	0	0	0	0			0
CE(e)D SYSTEM [kWh(e)/Wp]	7	3.15			9.26785	8.23559	8.14583	4.64122	9.37796	5.20749			2.67187	14	3.154	4.43042		2.7673	2.41372	1.73286	6.48796			4.39407	2.98	2.71853	2.17458	2.77758		2.17134	1.66408	3.15972		1.14537	1.37282
ERROR					3.34361	3.34361	3.34361			0			0	6	0	0.825		0	0	0	0			1.92444	0	0	0	0		0	0	0
TOTAL SYSTEM ENERGY INTENSITY [kWh(e)-in/kWh(e)-out]	0.21309	0.0958904			0.282126	0.250703	0.247971	0.141285	0.285478	0.158523			0.0813353	0.42618	0.0960122	0.134868		0.0842404		0.0527507	0.197503			0.133762	0.0907154	0.0827558	0.0661974	0.0845535		0.0660986	0.050657	0.0961864
ERROR					0.101784	0.101784	0.101784			0			0	0.182648	0	0.0251142		0		0	0			0.0585828	0	0	0	0		0	0	0
EROI [kWh(e)-out/kWh(e)-in]	4.69286	10.4286			3.54451	3.98878	4.03274	7.07787	3.50289	6.30822			12.2948	2.34643	10.4153	7.41465		11.8708		18.9571	5.06322			7.47598	11.0235	12.0837	15.1063	11.8268		15.1289	19.7406	10.3965		29.9392	25.03
EPBT [kWh(e)-in/kWh(e)-out*yrs]	5.32725	2.39726			7.05316	6.26758	6.19926	2.82571	5.70956	3.96308			2.03338	10.6545	2.4003	3.3717		2.10601		1.31877	4.93757			3.34404	2.26788	2.06889	1.65493	2.11384		1.65246	1.26643	2.40466		1.00203	1.19856
CE(e)D MODULE [kWh(e)/m2]	693	354.375	1167.7	953.333	915.049	915.049	915.049	291.696	805.514	489.335	415.307	309.605	241.118			431.587	256.96	318.611	275.556	169.583	626.351	471.956	407.411	503.17	328.68	235.29	172.141	175.861	191.538	217.5			200.357	144.917	175.271
CE(e)D SYSTEM [kWh(e)/m2]	840	425.25		0	1121.41	996.507	985.646	561.588	1134.73	676.974			323.296			474.055	0	365.283	318.611	211.409	769.472			615.17	393.36	358.846	343.584	355.531		286.617				161.497	193.568
CE(e)D BOS REAL [kWh(e)/m2]	147	70.875			206.361	81.4583	70.5972	269.892	329.219	187.639			82.178			42.4678		46.6722	43.0556	41.8257	143.122			112	64.68	123.556	171.443	179.669		69.1167				16.5806	18.2974
CE(e)D BOS MIN [kWh(e)/m2]	10.6	10.6	10.6	10.6	10.6	10.6	10.6	10.6	10.6	10.6	10.6	10.6	10.6	10.6	10.6	10.6	10.6	10.6	10.6	10.6	10.6	10.6	10.6	10.6	10.6	10.6	10.6	10.6	10.6	10.6			10.6	10.6	10.6
CE(e)D SYSTEM MIN [kWh(e)/m2]	703.6	364.975	1178.3	963.933	925.649	925.649	925.649	302.296	816.114	499.935	425.907	320.205	251.718			442.187	267.56	329.211	286.156	180.183	636.951	482.556	418.011	513.77	339.28	245.89	182.741	186.461	202.138	228.1			210.957	155.517	185.871
CE(e)D SYSTEM MIN [kWh(e)/Wp]	5.86333	2.70352	11.783	7.41487	7.64999	7.64999	7.64999	2.49832	6.74475	3.84565	3.22657	2.4258	2.08031			4.13259	2.02697	2.49402	2.16785	1.47691	5.37058	3.26051	3.23538	3.66979	2.5703	1.8628	1.15659	1.45673	1.26337	1.72803			1.59816	1.10296	1.31823
E(e)ROI MIN [kWh(e)-out/kWh(e)-in]	5.60262	12.1508	2.78791	2.65817	4.29412	4.29412	4.29412	10.5191	3.89637	8.54211	10.1811	13.5419	15.7909			7.94902	16.2065	13.1715	15.1533	22.2423	6.11666	10.0751	10.1534	8.95147	12.7806	17.6347	28.4025	22.5505	26.002	19.0101			20.5549	35.7403	29.9037
CE(e)D SYSTEM MAX [kWh/m2]	988	649.375	1462.7	1248.33	1210.05	1210.05	1210.05	586.696	1100.51	784.335	710.307	604.605	536.118			726.587	551.96	613.611	570.556	464.583	921.351	766.956	702.411	798.17	623.68	530.29	467.141	470.861	486.538	512.5			495.357	439.917	470.271
CE(e)D SYSTEM MAX [kWh/Wp	8.23333	4.81019	14.627	9.60256	10.0004	10.0004	10.0004	4.84873	9.09516	6.03334	5.38111	4.58034	4.43073			6.79053	4.18152	4.64857	4.32239	3.80806	7.76855	5.18213	5.43662	5.70122	4.72485	4.01735	2.95659	3.6786	3.04087	3.88258			3.7527	3.11998	3.33525
E(e)ROI MAX [kWh(e)-out/kWh(e)-in]	3.98988	6.82926	2.24585	3.42096	3.28487	3.28487	3.28487	6.77497	3.61181	5.44474	6.10469	7.17195	7.41414			4.83762	7.856	7.06669	7.59996	8.62644	4.22859	6.33909	6.04236	5.76193	6.9526	8.17704	11.1108	8.93002	10.8028	8.46088			8.75369	10.5289	9.84932
HARMONIZED CE(e)D MODULE [kWh(e)/m2]	594	303.75	1000.89	953.333	702.083	702.083	702.083	250.026	690.441	419.43	401.91	299.618	228.187			431.587	256.96	308.333	266.667	154.167	569.41	345.333	370.373	471.722	273.9	227.7	172.141	175.861	191.538	225			193.894	144.917	175.271
HARMONIZED CE(e)D SYSTEM [kWh(e)/m2]	720	364.5			860.417	764.583	756.25	481.361	972.628	580.263			305.958			474.055		353.5	308.333	192.19	699.52			576.722	327.8	347.27	343.584	355.531		296.5				161.497	193.568
HARMONIZED CE(e)D SYSTEM MIN [kWh(e)/m2]	603.086	312.836	1009.97	963.933	710.216	710.216	710.216	259.111	699.527	428.516	412.168	309.876	238.219			442.187	267.56	318.591	276.925	163.803	579.046	353.089	380.01	481.66	282.733	237.958	182.741	186.461	202.138	235.966			204.152	155.517	185.871
HARMONIZED CE(e)D SYSTEM MAX [kWh(e)/m2]	846.857	556.607	1253.74	1248.33	928.426	928.426	928.426	502.883	943.298	672.287	687.394	585.102	507.367			726.587	551.96	593.817	552.151	422.348	837.591	561.187	638.555	748.285	519.733	513.184	467.141	470.861	486.538	530.172			479.377	439.917	470.271
HARMONIZED CE(e)D MODULE [kWh(e)/W(p)]	4.95	2.25	10.0089	7.33333	5.80234	5.80234	5.80234	2.06633	5.70612	3.22638	3.04477	2.26983	1.88584			4.03352	1.94667	2.33586	2.0202	1.26366	4.80109	2.33333	2.86667	3.36944	2.075	1.725	1.0895	1.37392	1.19712	1.70455			1.46889	1.02778	1.24306
HARMONIZED CE(e)D SYSTEM [kWh(e)/W(p)]	6	2.7			7.11088	6.31887	6.25	3.97819	8.03825	4.46356			2.52858			4.43042		2.67803	2.33586	1.57533	5.89815			4.11944	2.48333	2.63083	2.17458	2.77758		2.24621				1.14537	1.37282
HARMONIZED CE(e)D SYSTEM MIN [kWh(e)/W(p)]	5.02571	2.3173	10.0997	7.41487	5.86956	5.86956	5.86956	2.14142	5.78121	3.29627	3.12248	2.34755	1.96875			4.13259	2.02697	2.41357	2.09791	1.34265	4.88234	2.38574	2.94125	3.44043	2.14192	1.80271	1.15659	1.45673	1.26337	1.78762			1.5466	1.10296	1.31823
HARMONIZED CE(e)D SYSTEM MAX [kWh(e)/W(p)]	7.05714	4.12302	12.5374	9.60256	7.67294	7.67294	7.67294	4.15605	7.79585	5.17144	5.20753	4.43259	4.19312			6.79053	4.18152	4.49862	4.18296	3.46187	7.06232	3.7918	4.94238	5.34489	3.93737	3.88776	2.95659	3.6786	3.04087	4.01646			3.63165	3.11998	3.33525
HARMONIZED E(e)ROI [kWh(e)-out/kWh(e)-in]	5.475	12.1667			4.61968	5.19871	5.256	8.25752	4.08671	7.35959			12.9915			7.41465		12.2665	14.0634	20.8528	5.56954			7.97438	13.2282	12.4865	15.1063	11.8268		14.6246				28.6807	23.9288
HARMONIZED E(e)ROI MIN [kWh(e)-out/kWh(e)-in]	6.53638	14.176	3.25257	4.43029	5.59668	5.59668	5.59668	15.3403	5.6822	9.9658	10.5205	13.9933	16.6857			7.94902	16.2065	13.6105	15.6584	24.4666	6.72833	13.7693	11.1687	9.54823	15.3367	18.2225	28.4025	22.5505	26.002	18.3764			21.2401	29.7836	24.9197
HARMONIZED E(e)ROI MAX [kWh(e)-out/kWh(e)-in]	4.65486	7.96747	2.62015	3.42096	4.28128	4.28128	4.28128	7.90413	4.21378	6.3522	6.30818	7.41102	7.83427			4.83762	7.856	7.30225	7.85329	9.48908	4.65144	8.66342	6.6466	6.14606	8.34312	8.4496	11.1108	8.93002	10.8028	8.17885			9.04548	10.5289	9.84932
INSTALLED CAPACITY [GW(p)]			0.18	0.18	0.22	0.22	0.22	0.22	0.22	0.51	0.62	1.71	1.71	1.71	1.71	2.3	2.3	3.14	3.14	3.14	3.14	4.17	4.17	4.17	4.17	4.17	6.95	6.95	6.95	11.03	11.03	19.94	33.29	33.29	33.29
MEAN CE(e)D [kWh(e)/m2]	444.157
MEAN HARMONIZED CE(e)D [kWh(e)/m2]	393.632

## Sheet: Amorphous Silicon
AUTHOR	Schaeffer	Schaeffer	Keoleian	Frankl	Frankl	Frankl	Frankl	Kato	Alsema	Gurzenich	Mathur	Pacca	Roes	Ito	de Wild-Scholten (UCTE)	de Wild-Scholten (CHINA)	Laleman	de Wild-Scholten	de Wild-Scholten (China)
YEAR	1990	1990	1997	1997	1997	1997	1997	1998	2000	2004	2004	2007	2007	2008	2008	2008	2010	2013	2013
LIFETIME [yrs]	25	25	25	25	25	25	20	20	25	25	25	25	25	25	30	30	25	30	30
CAPACITY [kW]	2500	25000	0.022							1.56		22.6		58			3
EFFICIENCY [%]	6	8	5	6	6	6	6	10	7	5		6.3	6.3	6.9	7	7	7	10	10
WAFER THICKNESS [μm]
PRIMARY or ELECTRICITY	PRIMARY (35%)	PRIMARY (35%)	PRIMARY (undefined)	PRIMARY (39.1%)	PRIMARY (39.1%)	PRIMARY (39.1%)	PRIMARY	PRIMARY	PRIMARY (35%)	PRIMARY (31.7%)	ELECTRICITY	PRIMARY (30%)	PRIMARY (36% conversion efficiency)	PRIMARY (30%)	PRIMARY (30%)	PRIMARY (30%)	PRIMARY (35%)	PRIMARY	PRIMARY
CONVERSION FACTOR [%]	35	35	30	39.1	39.1	39.1	35	38	35	31.7	30	30	36	30	30	30	35	30	30
CAPACITY FACTOR [%]	15	15	15	15	15	15	15	15	15	15	15	15	15	15	15	15	15	15	15
RATED INSOLATION [W/m^2]				1000	1000	1000	1000	1000	1000									1000	1000
CONSTRUCTION TIME [yrs]											1
CE(e)D MATERIALS [kWh(e)/Wp]				0.724074	0.724074	0.724074			0.550958
ERROR				0	0	0			0
CE(e)D MANUFACTURE [kWh(e)/Wp]				0.724074	0.724074	0.724074
ERROR				0	0	0
CE(e)D CELL [kWh(e)/Wp]				1.44815	1.44815	1.44815			0.550958
ERROR				0	0	0			0
CE(e)D MODULE [kWh(e)/Wp]	2.8	1.925	2.26667	3.32511	3.32511	3.32511	1.944	1.675	2.40088	2.77561		1.14167	1.71	1.47858	1.04861	1.04167		0.783	0.775
ERROR	0	0	0	0	0	0			0	0		0	0	0
CE(e)D SYSTEM [kWh(e)/Wp]	4.655	2.625		6.76446	4.68275	4.50173	5.89		4.99811	3.98988	5		2.46	3.04425	1.27028	1.27167		0.9583	0.9417
ERROR	0	0		0	0	0			0	0			0	0
TOTAL SYSTEM ENERGY INTENSITY [kWh(e)-in/kWh(e)-out]	0.141705	0.0799087		0.20592	0.142549	0.137039	0.1793		0.152149				0.0748858	0.0926712				0.029172	0.0286667
ERROR	0	0		0	0	0			0				0	0
EROI [kWh(e)-out/kWh(e)-in]	7.05693	12.5143		4.85626	7.01511	7.2972	5.57725		6.57249				13.3537	10.7908	26.58	26.73		34.2795	34.8837
EPBT [kWh(e)-in/kWh(e)-out*yrs]	3.54262	1.99772		5.14799	3.56374	3.42597	3.586		3.80373				1.87215	2.31678	1.12867	1.12233		0.87516	0.86
CE(e)D MODULE [kWh(e)/m2]	168	154	113.333	199.507	199.507	199.507	116.64	167.5	168.062	138.781		71.925	107.73	102.022	73.4028	72.9167		78.3	77.5
CE(e)D SYSTEM [kWh(e)/m2]	279.3	210		405.868	280.965	270.104	353.4		349.867	199.494			154.98	210.053	88.9194	89.0167		95.83	94.17
CE(e)D BOS REAL [kWh(e)/m2]	111.3	56		206.361	81.4583	70.5972	236.76		181.806	60.7132			47.25	108.031	15.5167	16.1		17.53	16.67
CE(e)D BOS MIN [kWh(e)/m2]	10.6	10.6	10.6	10.6	10.6	10.6	10.6	10.6	10.6	10.6		10.6	10.6	10.6	10.6	10.6		10.6	10.6
CE(e)D SYSTEM MIN [kWh(e)/m2]	178.6	164.6	123.933	210.107	210.107	210.107	127.24	178.1	178.662	149.381		82.525	118.33	112.622	84.0028	83.5167		88.9	88.1
CE(e)D SYSTEM MIN [kWh(e)/Wp]	2.97667	2.0575	2.47867	3.50178	3.50178	3.50178	2.12067	1.781	2.55231	2.98761		1.30992	1.87825	1.63221	1.20004	1.1931		0.889	0.881
E(e)ROI MIN [kWh(e)-out/kWh(e)-in]	11.0358	15.966	13.2531	9.38095	9.38095	9.38095	12.3923	14.7558	12.8707	10.9954		25.0779	17.4896	20.1261	32.8489	33.0401		44.342	44.7446
CE(e)D SYSTEM MAX [kWh/m2]	463	449	408.333	494.507	494.507	494.507	411.64	462.5	463.062	433.781		366.925	402.73	397.022	368.403	367.917		373.3	372.5
CE(e)D SYSTEM MAX [kWh/Wp	7.71667	5.6125	8.16667	8.24178	8.24178	8.24178	6.86067	4.625	6.61517	8.67561		5.82421	6.39254	5.75395	5.2629	5.25595		3.733	3.725
E(e)ROI MAX [kWh(e)-out/kWh(e)-in]	4.25702	5.85301	4.02245	3.98579	3.98579	3.98579	4.78816	7.1027	4.96586	3.78648		5.64025	5.1388	5.70913	6.24181	6.25006		8.79989	8.81879
HARMONIZED CE(e)D MODULE [kWh(e)/m2]	144	132	113.333	153.074	153.074	153.074	99.9771	132.237	144.053	131.338		71.925	89.775	102.022	73.4028	72.9167		78.3	77.5
HARMONIZED CE(e)D SYSTEM [kWh(e)/m2]	239.4	180		311.407	215.574	207.241	302.914		299.886	188.795			129.15	210.053	88.9194	89.0167		95.83	94.17
HARMONIZED CE(e)D SYSTEM MIN [kWh(e)/m2]	153.086	141.086	123.933	161.207	161.207	161.207	109.063	140.605	153.139	141.37		82.525	98.6083	112.622	84.0028	83.5167		88.9	88.1
HARMONIZED CE(e)D SYSTEM MAX [kWh(e)/m2]	396.857	384.857	408.333	379.417	379.417	379.417	352.834	365.132	396.91	410.518		366.925	335.608	397.022	368.403	367.917		373.3	372.5
HARMONIZED CE(e)D MODULE [kWh(e)/W(p)]	2.4	1.65	2.26667	2.55123	2.55123	2.55123	1.66629	1.32237	2.0579	2.62676		1.14167	1.425	1.47858	1.04861	1.04167		0.783	0.775
HARMONIZED CE(e)D SYSTEM [kWh(e)/W(p)]	3.99	2.25		5.19012	3.5929	3.45401	5.04857		4.28409	3.77591			2.05	3.04425	1.27028	1.27167		0.9583	0.9417
HARMONIZED CE(e)D SYSTEM MIN [kWh(e)/W(p)]	2.55143	1.76357	2.47867	2.68678	2.68678	2.68678	1.81771	1.40605	2.1877	2.82739		1.30992	1.56521	1.63221	1.20004	1.1931		0.889	0.881
HARMONIZED CE(e)D SYSTEM MAX [kWh(e)/W(p)]	6.61429	4.81071	8.16667	6.32361	6.32361	6.32361	5.88057	3.65132	5.67015	8.21036		5.82421	5.32712	5.75395	5.2629	5.25595		3.733	3.725
HARMONIZED E(e)ROI [kWh(e)-out/kWh(e)-in]	8.23308	14.6		6.32933	9.14303	9.51068	6.50679		7.6679	8.69989			16.0244	10.7908	25.8605	25.8322		34.2795	34.8837
HARMONIZED E(e)ROI MIN [kWh(e)-out/kWh(e)-in]	12.8751	18.627	13.2531	12.2265	12.2265	12.2265	18.0721	23.3633	15.0158	11.6185		25.0779	20.9876	20.1261	27.3741	27.5334		36.9516	37.2872
HARMONIZED E(e)ROI MAX [kWh(e)-out/kWh(e)-in]	4.96652	6.82851	4.02245	5.19481	5.19481	5.19481	5.58619	8.99676	5.7935	4.00104		5.64025	6.16656	5.70913	6.24181	6.25006		8.79989	8.81879
INSTALLED CAPACITY [GW(p)]			0.12	0.12	0.12	0.12	0.12	0.13	0.18	0.29	0.29	0.55	0.55	0.85	0.85	0.85	2.23
MEAN CE(e)D [kWh(e)/m2]	129.92
MEAN HARMONIZED CE(e)D [kWh(e)/m2]	113.059

## Sheet: Ribbon Silicon
AUTHOR	de Wild-Scholten	Fthenakis	de Wild-Scholten	Laleman
YEAR	2005	2006	2009	2010
LIFETIME [yrs]	25	25	25	25
CAPACITY [kW]				3
EFFICIENCY [%]	11	11.5	13.2	12
WAFER THICKNESS [μm]		300-330	190
PRIMARY or ELECTRICITY	primary	PRIMARY (31%)	PRIMARY (29%)	PRIMARY (35%)
CONVERSION FACTOR [%]	30	31	29	35
CAPACITY FACTOR [%]	15	15	15	15
RATED INSOLATION [W/m^2]	1000	1000	1000
CONSTRUCTION TIME [yrs]
CE(e)D MATERIALS [kWh(e)/Wp]
ERROR
CE(e)D MANUFACTURE [kWh(e)/Wp]
ERROR
CE(e)D CELL [kWh(e)/Wp]
ERROR
CE(e)D MODULE [kWh(e)/Wp]	1.742	1.72222	0.945918	2.91667
ERROR
CE(e)D SYSTEM [kWh(e)/Wp]		2.09737	1.46953	2.91667
ERROR				0
TOTAL SYSTEM ENERGY INTENSITY [kWh(e)-in/kWh(e)-out]		0.0638468	0.0447345	0.0887875
ERROR				0
EROI [kWh(e)-out/kWh(e)-in]		15.6625	22.3541	11.2628
EPBT [kWh(e)-in/kWh(e)-out*yrs]		1.59617	1.11836	2.21969
CE(e)D MODULE [kWh(e)/m2]	191.62	198.056	124.861	350
CE(e)D SYSTEM [kWh(e)/m2]		241.197	193.978
CE(e)D BOS REAL [kWh(e)/m2]		43.1417	69.1167
CE(e)D BOS MIN [kWh(e)/m2]	10.6	10.6	10.6	10.6
CE(e)D SYSTEM MIN [kWh(e)/m2]	202.22	208.656	135.461	360.6
CE(e)D SYSTEM MIN [kWh(e)/Wp]	1.83836	1.8144	1.02622	3.005
E(e)ROI MIN [kWh(e)-out/kWh(e)-in]	17.8692	18.1052	32.0107	10.9318
CE(e)D SYSTEM MAX [kWh/m2]	486.62	493.056	419.861	645
CE(e)D SYSTEM MAX [kWh/Wp	4.42382	4.28744	3.18077	5.375
E(e)ROI MAX [kWh(e)-out/kWh(e)-in]	7.42571	7.66192	10.3277	6.11162
HARMONIZED CE(e)D MODULE [kWh(e)/m2]	191.62	191.667	129.167	300
HARMONIZED CE(e)D SYSTEM [kWh(e)/m2]		233.417	200.667	300
HARMONIZED CE(e)D SYSTEM MIN [kWh(e)/m2]	202.22	201.925	140.132	309.086
HARMONIZED CE(e)D SYSTEM MAX [kWh(e)/m2]	486.62	477.151	434.339	552.857
HARMONIZED CE(e)D MODULE [kWh(e)/W(p)]	1.742	1.66667	0.978535	2.5
HARMONIZED CE(e)D SYSTEM [kWh(e)/W(p)]		2.02971	1.5202	2.5
HARMONIZED CE(e)D SYSTEM MIN [kWh(e)/W(p)]	1.83836	1.75587	1.06161	2.57572
HARMONIZED CE(e)D SYSTEM MAX [kWh(e)/W(p)]	4.42382	4.14914	3.29045	4.60715
HARMONIZED E(e)ROI [kWh(e)-out/kWh(e)-in]		16.1846	21.609	13.14
HARMONIZED E(e)ROI MIN [kWh(e)-out/kWh(e)-in]	17.8692	18.7087	30.9436	12.7537
HARMONIZED E(e)ROI MAX [kWh(e)-out/kWh(e)-in]	7.42571	7.91731	9.98344	7.13023
INSTALLED CAPACITY [GW(p)]	0.16	0.2	0.45	0.65
MEAN CE(e)D [kWh(e)/m2]	216.134
MEAN HARMONIZED CE(e)D [kWh(e)/m2]	203.113

## Sheet: Cadmium Telluride
AUTHOR	Kato	kato	kato	Fthenakis	Raugei	Roes	Ito	Fthenakis	Raugei	Held	Laleman	de Wild-Scholten (CHINA)	de Wild-Scholten (UCTE)	Held
YEAR	2000	2000	2000	2006	2007	2007	2008	2009	2009	2009	2010	2010	2010	2011
LIFETIME [yrs]	25	25	25	25	25	25	25	25	25	25	25	30	30	25
CAPACITY [kW]	10MW	30MW	100MW				65				3
EFFICIENCY [%]	11	12	13	9		9	9	10.9	10.9	10.9	7.1	11.9	11.9	10.9
WAFER THICKNESS [μm]
PRIMARY or ELECTRICITY	Primary	Primary	Primary	PRIMARY (31%)	PRIMARY (32%)	PRIMARY (36% conversion efficiency)	PRIMARY (30%)	PRIMARY (31%)	PRIMARY (29%)	PRIMARY (29%)	PRIMARY (35%)	PRIMARY (unspecified)	PRIMARY (unspecified)	PRIMARY (unspecified)
CONVERSION FACTOR [%]	38	38	38	31	32	36	30	31	29	29	35	30	30	30
CAPACITY FACTOR [%]	15	15	15	15	15	15	15	15	15	15	15	15	15	15
RATED INSOLATION [W/m^2]	1000	1000	1000	1000				1000	1000	1000		1000	1000	1000
CONSTRUCTION TIME [yrs]
CE(e)D MATERIALS [kWh(e)/Wp]
ERROR
CE(e)D MANUFACTURE [kWh(e)/Wp]
ERROR
CE(e)D CELL [kWh(e)/Wp]
ERROR
CE(e)D MODULE [kWh(e)/Wp]	1.73	1.331	1.033	1.14815	0.675556	0.95	0.858583	0.76315	0.630403	0.592712		0.438889	0.434722	0.573394
ERROR
CE(e)D SYSTEM [kWh(e)/Wp]				1.66673	1.94667	1.57	2.21275	1.19134	1.00066	1.02653	2.81944	0.572222	0.573056	0.909021
ERROR
TOTAL SYSTEM ENERGY INTENSITY [kWh(e)-in/kWh(e)-out]				0.0507375	0.0592593	0.047793	0.0673592	0.0362659	0.0304616	0.031249	0.0858277			0.0276719
ERROR
EROI [kWh(e)-out/kWh(e)-in]				19.7093	16.875	20.9236	14.8458	27.5741	32.8282	32.001	11.6512	59.73	60.18	36.1378
EPBT [kWh(e)-in/kWh(e)-out*yrs]				1.26844	1.48148	1.19482	1.68398	0.906648	0.761539	0.781225	2.14569	0.50226	0.498504	0.691797
CE(e)D MODULE [kWh(e)/m2]	190.3	159.72	134.29	103.333		85.5	77.2725	83.1833	68.7139	64.6056		52.2278	51.7319	62.5
CE(e)D SYSTEM [kWh(e)/m2]				150.006		141.3	199.148	129.856	109.072	111.892		68.0944	68.1936	99.0833
CE(e)D BOS REAL [kWh(e)/m2]				46.6722		55.8	121.875	46.6722	40.3583	47.2861		15.8667	16.4617	36.5833
CE(e)D BOS MIN [kWh(e)/m2]	10.6	10.6	10.6	10.6		10.6	10.6	10.6	10.6	10.6		10.6	10.6	10.6
CE(e)D SYSTEM MIN [kWh(e)/m2]	200.9	170.32	144.89	113.933		96.1	87.8725	93.7833	79.3139	75.2056		62.8278	62.3319	73.1
CE(e)D SYSTEM MIN [kWh(e)/Wp]	1.82636	1.41933	1.11454	1.26593		1.06778	0.976361	0.860398	0.72765	0.689959		0.527965	0.523798	0.670642
E(e)ROI MIN [kWh(e)-out/kWh(e)-in]	17.9866	23.1447	29.4741	25.9494		30.7648	33.6453	38.18	45.1453	47.6115		74.6641	75.258	48.9829
CE(e)D SYSTEM MAX [kWh/m2]	485.3	454.72	429.29	398.333		380.5	372.272	378.183	363.714	359.606		347.228	346.732	357.5
CE(e)D SYSTEM MAX [kWh/Wp	4.41182	3.78933	3.30223	4.42593		4.22778	4.13636	3.46957	3.33682	3.29913		2.91788	2.91371	3.27982
E(e)ROI MAX [kWh(e)-out/kWh(e)-in]	7.44591	8.66907	9.94782	7.42218		7.77004	7.94176	9.46803	9.84469	9.95716		11.2582	11.2743	10.0158
HARMONIZED CE(e)D MODULE [kWh(e)/m2]	150.237	126.095	106.018	100		71.25	77.2725	80.5	71.0833	66.8333		52.2278	51.7319	62.5
HARMONIZED CE(e)D SYSTEM [kWh(e)/m2]				145.167		117.75	199.148	125.667	112.833	115.75		68.0944	68.1936	99.0833
HARMONIZED CE(e)D SYSTEM MIN [kWh(e)/m2]	158.605	134.463	114.387	110.258		80.0833	87.8725	90.7581	82.0489	77.7989		62.8278	62.3319	73.1
HARMONIZED CE(e)D SYSTEM MAX [kWh(e)/m2]	383.132	358.989	338.913	385.484		317.083	372.272	365.984	376.256	372.006		347.228	346.732	357.5
HARMONIZED CE(e)D MODULE [kWh(e)/W(p)]	1.36579	1.05079	0.815526	1.11111		0.791667	0.858583	0.738532	0.652141	0.61315		0.438889	0.434722	0.573394
HARMONIZED CE(e)D SYSTEM [kWh(e)/W(p)]				1.61296		1.30833	2.21275	1.15291	1.03517	1.06193		0.572222	0.573056	0.909021
HARMONIZED CE(e)D SYSTEM MIN [kWh(e)/W(p)]	1.44187	1.12053	0.879899	1.22509		0.889815	0.976361	0.832643	0.752742	0.713751		0.527965	0.523798	0.670642
HARMONIZED CE(e)D SYSTEM MAX [kWh(e)/W(p)]	3.48301	2.99158	2.60702	4.28315		3.52315	4.13636	3.35765	3.45189	3.4129		2.91788	2.91371	3.27982
HARMONIZED E(e)ROI [kWh(e)-out/kWh(e)-in]				20.3662		25.1083	14.8458	28.4932	31.734	30.9343		57.4078	57.3243	36.1378
HARMONIZED E(e)ROI MIN [kWh(e)-out/kWh(e)-in]	22.783	29.3166	37.3338	26.8144		36.9178	33.6453	39.4527	43.6405	46.0245		62.2201	62.715	48.9829
HARMONIZED E(e)ROI MAX [kWh(e)-out/kWh(e)-in]	9.43149	10.9808	12.6006	7.66958		9.32405	7.94176	9.78363	9.51653	9.62525		11.2582	11.2743	10.0158
INSTALLED CAPACITY [GW(p)]	0.01	0.01	0.01	0.1	0.21	0.21	0.58	1.37	1.37	1.37	2.26	2.26	2.26	4.75
MEAN CE(e)D [kWh(e)/m2]	94.4482
MEAN HARMONIZED CE(e)D [kWh(e)/m2]	84.6457

## Sheet: Copper Indium Diselenide
AUTHOR	Knapp	Roes	Raugei	Ito	Laleman	de Wild-Scholten (UCTE)	de Wild-Scholten (CHINA)
YEAR	2000	2007	2007	2008	2010	2011	2011
LIFETIME [yrs]	25	25	25	25	25	30	30
CAPACITY [kW]				80	3
EFFICIENCY [%]		11		11	10.7	11.7	11.7
WAFER THICKNESS [μm]
PRIMARY or ELECTRICITY	ELECTRICITY	PRIMARY (36%)	PRIMARY (32%)	PRIMARY (30%)	PRIMARY (35%)	PRIMARY (unspecified)	PRIMARY (unspecified)
CONVERSION FACTOR [%]	30	36	32	30	35	30	30
CAPACITY FACTOR [%]	15	15	15	15	15	15	15
RATED INSOLATION [W/m^2]
CONSTRUCTION TIME [yrs]
CE(e)D MATERIALS [kWh(e)/Wp]
ERROR
CE(e)D MANUFACTURE [kWh(e)/Wp]
ERROR
CE(e)D CELL [kWh(e)/Wp]
ERROR
CE(e)D MODULE [kWh(e)/Wp]	3.06944	3.46	2.46222	0.81925		0.819444	0.8125
ERROR	0	0	0	0
CE(e)D SYSTEM [kWh(e)/Wp]		4.03	3.50222	1.86508	2.86806	0.916111	0.9175
ERROR		0	0	0	0
TOTAL SYSTEM ENERGY INTENSITY [kWh(e)-in/kWh(e)-out]		0.122679	0.106613	0.0567757	0.0873076
ERROR		0	0	0	0
EROI [kWh(e)-out/kWh(e)-in]		8.15136	9.37976	17.6132	11.4538	36.67	36.67
EPBT [kWh(e)-in/kWh(e)-out*yrs]		3.06697	2.66531	1.41939	2.18269	0.818107	0.818107
CE(e)D MODULE [kWh(e)/m2]		380.6		90.1175		95.875	95.0625
CE(e)D SYSTEM [kWh(e)/m2]		443.3		205.159	306.882	107.185	107.347
CE(e)D BOS REAL [kWh(e)/m2]		62.7		115.042		11.31	12.285
CE(e)D BOS MIN [kWh(e)/m2]		10.6		10.6		10.6	10.6
CE(e)D SYSTEM MIN [kWh(e)/m2]		391.2		100.717		106.475	105.662
CE(e)D SYSTEM MIN [kWh(e)/Wp]		3.55636		0.915614		0.910043	0.903098
E(e)ROI MIN [kWh(e)-out/kWh(e)-in]		9.23696		35.8776		43.3166	43.6497
CE(e)D SYSTEM MAX [kWh/m2]		675.6		385.117		390.875	390.062
CE(e)D SYSTEM MAX [kWh/Wp		6.14182		3.50107		3.34081	3.33387
E(e)ROI MAX [kWh(e)-out/kWh(e)-in]		5.34858		9.38285		9.83294	9.85342
HARMONIZED CE(e)D MODULE [kWh(e)/m2]		317.167		90.1175		95.875	95.0625
HARMONIZED CE(e)D SYSTEM [kWh(e)/m2]		369.417		205.159	263.042	107.185	107.347
HARMONIZED CE(e)D SYSTEM MIN [kWh(e)/m2]		326		100.717		106.475	105.662
HARMONIZED CE(e)D SYSTEM MAX [kWh(e)/m2]		563		385.117		390.875	390.062
HARMONIZED CE(e)D MODULE [kWh(e)/W(p)]		2.88333		0.81925		0.819444	0.8125
HARMONIZED CE(e)D SYSTEM [kWh(e)/W(p)]		3.35833		1.86508	2.45833	0.916111	0.9175
HARMONIZED CE(e)D SYSTEM MIN [kWh(e)/W(p)]		2.96364		0.915614		0.910043	0.903098
HARMONIZED CE(e)D SYSTEM MAX [kWh(e)/W(p)]		5.11818		3.50107		3.34081	3.33387
HARMONIZED E(e)ROI [kWh(e)-out/kWh(e)-in]		9.78164		17.6132	13.3627	35.8581	35.8038
HARMONIZED E(e)ROI MIN [kWh(e)-out/kWh(e)-in]		11.0844		35.8776		36.0972	36.3748
HARMONIZED E(e)ROI MAX [kWh(e)-out/kWh(e)-in]		6.41829		9.38285		9.83294	9.85342
INSTALLED CAPACITY [GW(p)]	0	0.03	0.03	0.09	0.51	1.4	1.4
MEAN CE(e)D [kWh(e)/m2]	165.414
MEAN HARMONIZED CE(e)D [kWh(e)/m2]	149.555

## Sheet: Organic
AUTHOR	Nieves	Dajun	Anctil	Anctil	Anctil	Anctil	Anctil	Anctil	Anctil	Anctil	Rafael	Rafael	Nieves	Nieves	Nieves	Nieves	Nieves	Nieves	Nieves	Nieves	Nieves	Nieves	Nieves	Nieves	Nieves
YEAR	2011	2012	2010	2010	2010	2010	2010	2010	2010	2010	2009	2009	2012	2013	2013	2013	2013	2013	2013	2013	2013	2013	2013	2013	2013
LIFETIME [yrs]	15	15	15	15	15	15	15	15	15	15	15	15	5	5	5	5	5	5	5	5	5	5	5	5	5
CAPACITY [kW]
EFFICIENCY [%]	2	3	4.5	4.76	5	5.3	5.4	5.5	6.1	7.4	5	10	3	3	3	3	3	3	3	3	3	3	3	3	3
WAFER THICKNESS [μm]
PRIMARY or ELECTRICITY	PRIMARY (35%)	PRIMARY 35%	PRIMARY 30%	PRIMARY 30%	PRIMARY 30%	PRIMARY 30%	PRIMARY 30%	PRIMARY 30%	PRIMARY 30%	PRIMARY 30%	PRIMARY 35%	PRIMARY 35%	PRIMARY 30%	PRIMARY 35%	PRIMARY 35%	PRIMARY 35%	PRIMARY 35%	PRIMARY 35%	PRIMARY 35%	PRIMARY 35%	PRIMARY 35%	PRIMARY 35%	PRIMARY 35%	PRIMARY 35%	PRIMARY 35%
CONVERSION FACTOR [%]	35	35	30	30	30	30	30	30	30	30	35	35	30	35	35	35	35	35	35	35	35	35	35	35	35
CAPACITY FACTOR [%]	15	15	15	15	15	15	15	15	15	15	15	15	15	16.5	16.5	16.5	16.5	16.5	16.5	16.5	16.5	16.5	16.5	16.5	16.5
RATED INSOLATION [W/m^2]	1000	1000	1000	1000	1000	1000	1000	1000	1000	1000	1000	1000	1000	1000	1000	1000	1000	1000	1000	1000	1000	1000	1000	1000	1000
CONSTRUCTION TIME [yrs]
CE(e)D MATERIALS [kWh(e)/Wp]
ERROR
CE(e)D MANUFACTURE [kWh(e)/Wp]
ERROR
CE(e)D CELL [kWh(e)/Wp]
ERROR
CE(e)D MODULE [kWh(e)/Wp]	3.07271	0.242083	0.579167	0.547222	0.477778	0.570833	0.586111	0.579167	0.868056	0.4625	9.07722	4.53861	0.609167	0.608935	0.67213	0.704699	0.875486	0.938681	0.97125	0.65787	0.681366	0.753634	0.977407	1.0406	1.07317
ERROR
CE(e)D SYSTEM [kWh(e)/Wp]
ERROR
TOTAL SYSTEM ENERGY INTENSITY [kWh(e)-in/kWh(e)-out]														59.34	53.76	51.28	41.27	38.5	37.2	54.93	53.03	47.95	36.97	34.73	33.67
ERROR
EROI [kWh(e)-out/kWh(e)-in]	10.69	135.7	56.72	60.03	8.76	57.55	56.05	56.72	37.84	71.03	3.62	7.24	53.93	59.34	53.76	51.28	41.27	38.5	37.2	54.93	53.03	47.95	36.97	34.73	33.67
EPBT [kWh(e)-in/kWh(e)-out*yrs]	1.40318	0.110538	0.264457	0.249875	1.71233	0.260643	0.267618	0.264457	0.396406	0.211178	4.14365	2.07182	0.0927128	0.0842602	0.093006	0.0975039	0.121153	0.12987	0.134409	0.0910249	0.0942863	0.104275	0.135245	0.143968	0.1485
CE(e)D MODULE [kWh(e)/m2]	36.8725	4.3575	15.6375	15.6287	14.3333	18.1525	18.99	19.1125	31.77	20.535	272.316	272.316	3.655	3.6536	4.033	4.2282	5.2529	5.63	5.8275	3.947	4.088	4.522	5.864	6.243	6.439
CE(e)D SYSTEM [kWh(e)/m2]
CE(e)D BOS REAL [kWh(e)/m2]
CE(e)D BOS MIN [kWh(e)/m2]	10.6	10.6	10.6	10.6	10.6	10.6	10.6	10.6	10.6	10.6	10.6	10.6	10.6	10.6	10.6	10.6	10.6	10.6	10.6	10.6	10.6	10.6	10.6	10.6	10.6
CE(e)D SYSTEM MIN [kWh(e)/m2]	47.4725	14.9575	26.2375	26.2287	24.9333	28.7525	29.59	29.7125	42.37	31.135	282.916	282.916	14.255	14.2536	14.633	14.8282	15.8529	16.23	16.4275	14.547	14.688	15.122	16.464	16.843	17.039
CE(e)D SYSTEM MIN [kWh(e)/Wp]	2.37363	0.498583	0.583056	0.551023	0.498666	0.5425	0.547963	0.540227	0.69459	0.420743	5.65832	2.82916	0.475167	0.47512	0.487767	0.494273	0.52843	0.541	0.547583	0.4849	0.4896	0.504067	0.5488	0.561433	0.567967
E(e)ROI MIN [kWh(e)-out/kWh(e)-in]	8.30375	39.532	33.8047	35.7698	39.5255	36.3318	35.9696	36.4846	28.3764	46.8457	3.48337	6.96673	13.8267	13.8281	13.4696	13.2922	12.4331	12.1442	11.9982	13.5492	13.4191	13.034	11.9716	11.7022	11.5676
CE(e)D SYSTEM MAX [kWh/m2]	331.873	299.358	310.637	310.629	309.333	313.152	313.99	314.113	326.77	315.535	567.316	567.316	298.655	298.654	299.033	299.228	300.253	300.63	300.827	298.947	299.088	299.522	300.864	301.243	301.439
CE(e)D SYSTEM MAX [kWh/Wp	16.5936	9.97858	6.90306	6.52581	6.18667	5.90854	5.81463	5.71114	5.35689	4.26399	11.3463	5.67316	9.95517	9.95512	9.96777	9.97427	10.0084	10.021	10.0276	9.9649	9.9696	9.98407	10.0288	10.0414	10.048
E(e)ROI MAX [kWh(e)-out/kWh(e)-in]	1.97968	3.29205	4.75876	5.03386	5.30981	5.55975	5.64954	5.75192	6.13229	7.70406	2.89521	5.79042	3.29979	3.29981	3.29562	3.29347	3.28223	3.27812	3.27596	3.29657	3.29502	3.29024	3.27557	3.27145	3.26932
HARMONIZED CE(e)D MODULE [kWh(e)/m2]	31.605	3.735	15.6375	15.6287	14.3333	18.1525	18.99	19.1125	31.77	20.535	233.414	233.414	3.655	3.13166	3.45686	3.62417	4.50249	4.82571	4.995	3.38314	3.504	3.876	5.02629	5.35114	5.51914
HARMONIZED CE(e)D SYSTEM [kWh(e)/m2]
HARMONIZED CE(e)D SYSTEM MIN [kWh(e)/m2]	40.6907	12.8207	26.2375	26.2287	24.9333	28.7525	29.59	29.7125	42.37	31.135	242.499	242.499	14.255	12.2174	12.5426	12.7099	13.5882	13.9114	14.0807	12.4689	12.5897	12.9617	14.112	14.4369	14.6049
HARMONIZED CE(e)D SYSTEM MAX [kWh(e)/m2]	284.462	256.592	310.637	310.629	309.333	313.152	313.99	314.113	326.77	315.535	486.271	486.271	298.655	255.989	256.314	256.481	257.36	257.683	257.852	256.24	256.361	256.733	257.883	258.208	258.376
HARMONIZED CE(e)D MODULE [kWh(e)/W(p)]	1.58025	0.1245	0.3475	0.328334	0.286666	0.3425	0.351667	0.3475	0.52082	0.2775	4.66827	2.33414	0.121833	0.104389	0.115229	0.120806	0.150083	0.160857	0.1665	0.112771	0.1168	0.1292	0.167543	0.178371	0.183971
HARMONIZED CE(e)D SYSTEM [kWh(e)/W(p)]
HARMONIZED CE(e)D SYSTEM MIN [kWh(e)/W(p)]	2.03454	0.427357	0.583056	0.551023	0.498666	0.5425	0.547963	0.540227	0.69459	0.420743	4.84999	2.42499	0.475167	0.407246	0.418086	0.423663	0.45294	0.463714	0.469357	0.415629	0.419657	0.432057	0.4704	0.481229	0.486829
HARMONIZED CE(e)D SYSTEM MAX [kWh(e)/W(p)]	14.2231	8.55307	6.90306	6.52581	6.18667	5.90854	5.81463	5.71114	5.35689	4.26399	9.72542	4.86271	9.95517	8.53296	8.5438	8.54938	8.57865	8.58943	8.59507	8.54134	8.54537	8.55777	8.59611	8.60694	8.61254
HARMONIZED E(e)ROI [kWh(e)-out/kWh(e)-in]	20.7879	263.855	94.5324	100.051	114.593	95.9124	93.4123	94.5324	63.0737	118.378	7.03686	14.0737	269.631	314.69	285.086	271.924	218.879	204.218	197.297	291.297	281.25	254.257	196.069	184.166	178.56
HARMONIZED E(e)ROI MIN [kWh(e)-out/kWh(e)-in]	16.1462	76.8678	56.3411	59.6164	65.8758	60.553	59.9493	60.8077	47.2941	78.0761	6.77321	13.5464	69.1336	80.6638	78.5724	77.5381	72.5262	70.841	69.9893	79.0369	78.2782	76.0316	69.8342	68.2628	67.4776
HARMONIZED E(e)ROI MAX [kWh(e)-out/kWh(e)-in]	2.30962	3.84073	4.75876	5.03386	5.30981	5.55975	5.64954	5.75192	6.13229	7.70406	3.37775	6.75549	3.29979	3.84978	3.84489	3.84239	3.82927	3.82447	3.82196	3.846	3.84419	3.83862	3.82149	3.81669	3.8142
INSTALLED CAPACITY [GW(p)]
MEAN CE(e)D [kWh(e)/m2]	32.1362
MEAN HARMONIZED CE(e)D [kWh(e)/m2]	28.4471

## Sheet: GaAs
AUTHOR	Mohr	Mohr
YEAR	2007	2007
LIFETIME [yrs]	30	30
CAPACITY [kW]
EFFICIENCY [%]	23.3	28.5
WAFER THICKNESS [μm]
PRIMARY or ELECTRICITY	PRIMARY	PRIMARY
CONVERSION FACTOR [%]	41	41
CAPACITY FACTOR [%]	15	15
RATED INSOLATION [W/m^2]	1000	1000
CONSTRUCTION TIME [yrs]
CE(e)D MATERIALS [kWh(e)/Wp]
ERROR
CE(e)D MANUFACTURE [kWh(e)/Wp]
ERROR
CE(e)D CELL [kWh(e)/Wp]
ERROR
CE(e)D MODULE [kWh(e)/Wp]	3.75833	3.41667
ERROR
CE(e)D SYSTEM [kWh(e)/Wp]
ERROR
TOTAL SYSTEM ENERGY INTENSITY [kWh(e)-in/kWh(e)-out]
ERROR
E(e)ROI MAX [kWh(e)-out/kWh(e)-in]	10.4887	11.5376
EPBT [kWh(e)-in/kWh(e)-out*yrs]	2.86022	2.6002
CE(e)D MODULE [kWh(e)/m2]	875.69	973.75
CE(e)D SYSTEM [kWh(e)/m2]
CE(e)D BOS REAL [kWh(e)/m2]
CE(e)D BOS MIN [kWh(e)/m2]	10.6	11.6
CE(e)D SYSTEM MIN [kWh(e)/m2]	886.29	985.35
CE(e)D SYSTEM MIN [kWh(e)/Wp]	3.80382	3.45737
E(e)ROI MIN [kWh(e)-out/kWh(e)-in]	10.3633	11.4017
CE(e)D SYSTEM MAX [kWh/m2]	1170.69	1268.75
CE(e)D SYSTEM MAX [kWh/Wp	5.02442	4.45175
E(e)ROI MAX [kWh(e)-out/kWh(e)-in]	6.53807	7.37911
HARMONIZED CE(e)D MODULE [kWh(e)/m2]	640.749	712.5
HARMONIZED CE(e)D SYSTEM [kWh(e)/m2]
HARMONIZED CE(e)D SYSTEM MIN [kWh(e)/m2]	648.505	720.988
HARMONIZED CE(e)D SYSTEM MAX [kWh(e)/m2]	856.602	928.354
HARMONIZED CE(e)D MODULE [kWh(e)/W(p)]	2.74999	2.5
HARMONIZED CE(e)D SYSTEM [kWh(e)/W(p)]
HARMONIZED CE(e)D SYSTEM MIN [kWh(e)/W(p)]	2.78328	2.52978
HARMONIZED CE(e)D SYSTEM MAX [kWh(e)/W(p)]	3.67641	3.25738
HARMONIZED E(e)ROI [kWh(e)-out/kWh(e)-in]
HARMONIZED E(e)ROI MIN [kWh(e)-out/kWh(e)-in]	11.8026	12.9853
HARMONIZED E(e)ROI MAX [kWh(e)-out/kWh(e)-in]	8.93536	10.0848
INSTALLED CAPACITY [GW(p)]
MEAN CE(e)D [kWh(e)/m2]
MEAN HARMONIZED CE(e)D [kWh(e)/m2]
